# Supplementary material for: The lncRNA GATA6-AS epigenetically regulates endothelial gene expression via interaction with LOXL2
Source: Springer Nature journal article supplement (doi:10.1038/s41467-017-02431-1), 2018-01-10
Supplement: MOESM1 [file 41467_2017_2431_MOESM1_ESM.pdf]

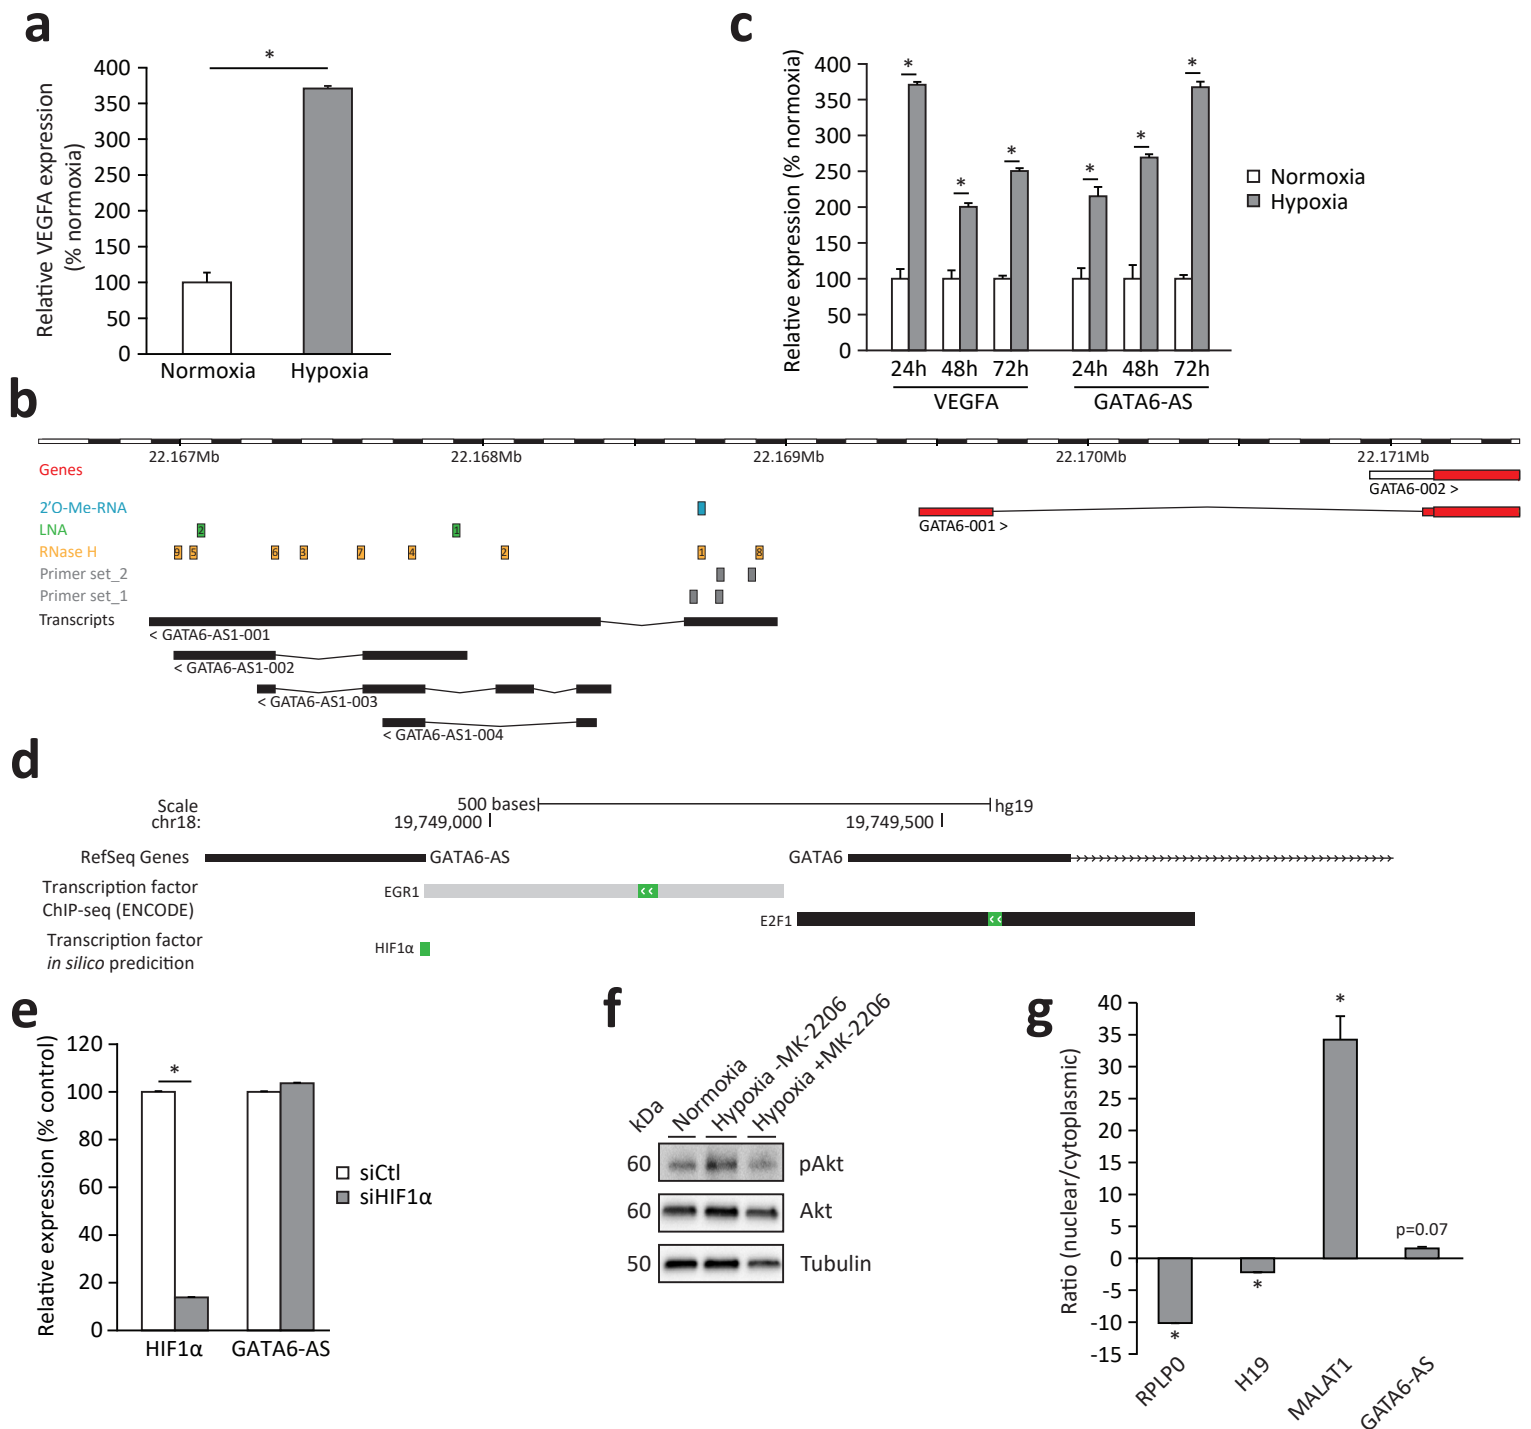

**Supplementary Figure 1: The antisense transcript of GATA6 is up-regulated by hypoxia in an Akt-dependent manner.** **a** HUVECs were exposed to hypoxia (24h, 0.2% O<sub>2</sub>) or kept under normoxic conditions and induction of hypoxia was assayed by RT-qPCR using primers targeting VEGFA, normalized to RPLP0 mRNA ( $n=4$ ; SEM; \*  $t$ -test  $p<0.05$ ). **b** Schematic overview of the human GATA6/GATA6-AS locus and oligonucleotide sequences used in this study. Transcripts (black) indicate the four annotated GATA6-AS transcripts and genes (red) GATA6. Primer pairs for RT-qPCR (grey; set 1 and 2), DNA oligonucleotides for RNase H cleavage (yellow; 1-9), LNA GapmeRs (green; 1, 2), and the 2'O-Me-RNA probe, used for RNA affinity selection (blue) are indicated at their respective positions by colored boxes. Scales at the top refer to chromosome 18. **c** HUVECs were exposed to hypoxia (0.2% O<sub>2</sub>) for 24h, 48h and 72h or kept under normoxic conditions and GATA6-AS expression was analyzed by RT-qPCR. Relative expression levels were normalized to RPLP0 mRNA. VEGFA is shown as hypoxia-induced positive control ( $n=3-4$ ; SEM; \*  $t$ -test  $p<0.05$ ). **d** Snapshot of the human GATA6/GATA6-AS locus with binding sites for E2F1 and EGR1. Downloaded and modified from UCSC genome browser (Homo sapiens: GRCh38/hg38). *In silico* analysis of transcription factor binding was performed using Promo software (<http://bit.ly/1LkHwon>). **e** HUVECs were transfected with siRNAs targeting HIF1α or with control siRNAs and exposed to hypoxia (24h, 0.2% O<sub>2</sub>). Subsequently, RNA was isolated, DNase digested and relative expression levels of HIF1α and GATA6-AS were analyzed by RT-qPCR and normalized to RPLP0 mRNA levels ( $n=3$ ; SEM; \*  $t$ -test  $p<0.05$ ). **f** Akt phosphorylation was inhibited in HUVECs by addition of MK-2206 to the culture medium 1h prior to hypoxic treatment (24h, 0.2% O<sub>2</sub>). As controls, cells were incubated under normoxic conditions. Akt and phosphorylated Akt (pAkt), which represents the activated form and is known to be increased under hypoxia, were measured by western blotting. Tubulin was used as loading control ( $n=2$ ; representative images are shown). **g** RNA from hypoxic (24h, 0.2% O<sub>2</sub>) HUVECs was isolated from nuclear and cytoplasmic fractions and analyzed by RT-qPCR using primers targeting the indicated transcripts ( $n=4$ ; SEM; \*  $t$ -test  $p<0.05$ ).

**a**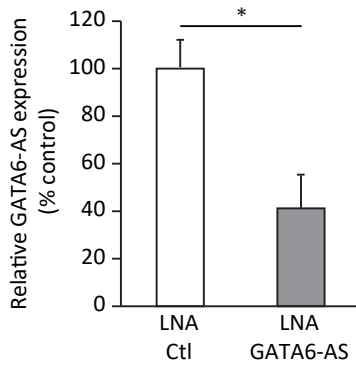**b**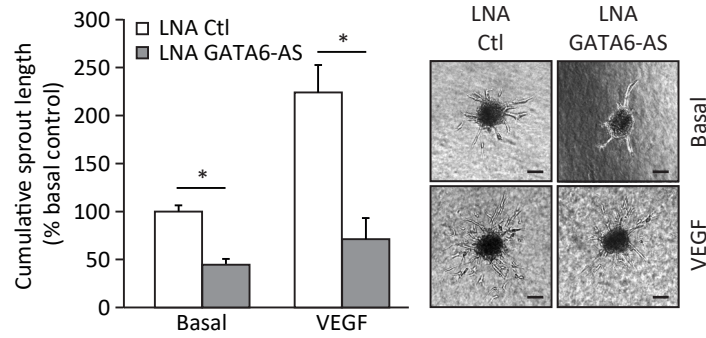**c**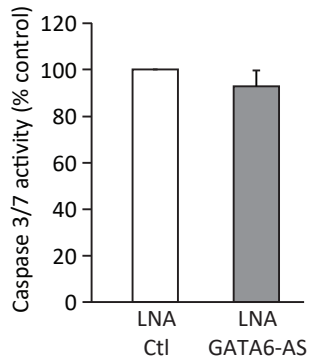**d**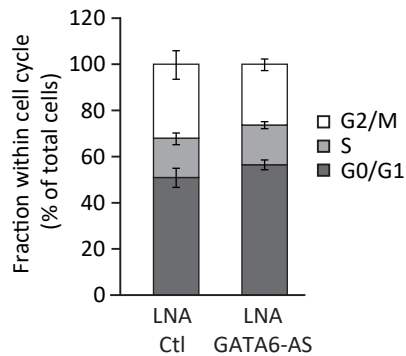**e**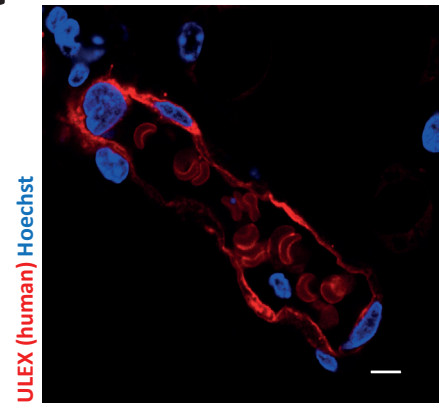

**Supplementary Figure 2: GATA6-AS regulates endothelial phenotype and function.** **a** HUVECs were transfected with an alternative GapmeR (#2, see Supplementary Fig. 1b) targeting GATA6-AS or with control GapmeRs and relative expression of GATA6-AS was determined by RT-qPCR, normalized to RPLP0 mRNA ( $n=6$ ; SEM; \*  $t$ -test  $p<0.05$ ). **b** GATA6-AS-silenced cells (alternative GapmeR #2) or control cells were used for *in vitro* spheroid sprouting assays under basal conditions and VEGFA (50ng/ml) stimulation ( $n=5-6$ ; SEM; \*  $t$ -test  $p<0.05$ ; representative images are shown; scale bars are 50 $\mu$ m). **c** HUVECs were transfected with GapmeRs targeting GATA6-AS or with control GapmeRs and caspase 3/7 activity was determined after 48h by luminescence measurements ( $n=11$ ; SEM). **d** HUVECs were transfected with GapmeRs targeting GATA6-AS or with control GapmeRs and subjected to cell cycle analysis using BrdU-assays ( $n=4$ ; SEM). **e** Matrigel basement matrix plugs containing spheroids derived from GATA6-AS or control GapmeR treated HUVECs were injected subcutaneously in immunodeficient mice. Plugs were harvested 21 days later and used for immunohistochemistry detecting human endothelial cells (ulex rhodamine, red). Nuclei were stained with Hoechst (blue) and erythrocytes were detected based on their autofluorescence (a representative image of a perfused vessel originating from HUVECs is shown; scale bar is 5 $\mu$ m).

**a**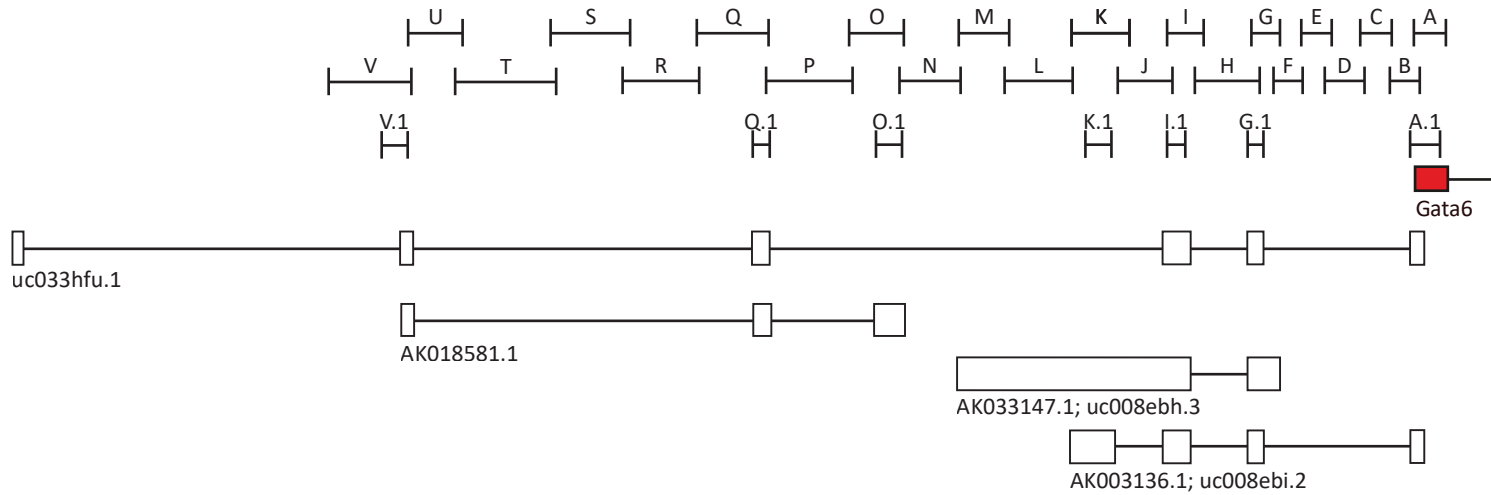**b**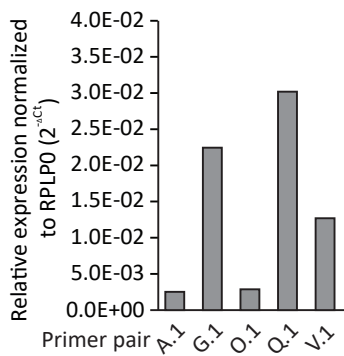

| Primer pair | Ct    | -RT Ct |
|-------------|-------|--------|
| <b>A.1</b>  | 25.99 | 32.33  |
| <b>G.1</b>  | 22.83 | 34.38  |
| <b>O.1</b>  | 25.79 | 31.14  |
| <b>Q.1</b>  | 22.40 | 32.35  |
| <b>V.1</b>  | 23.65 | 30.40  |

**c**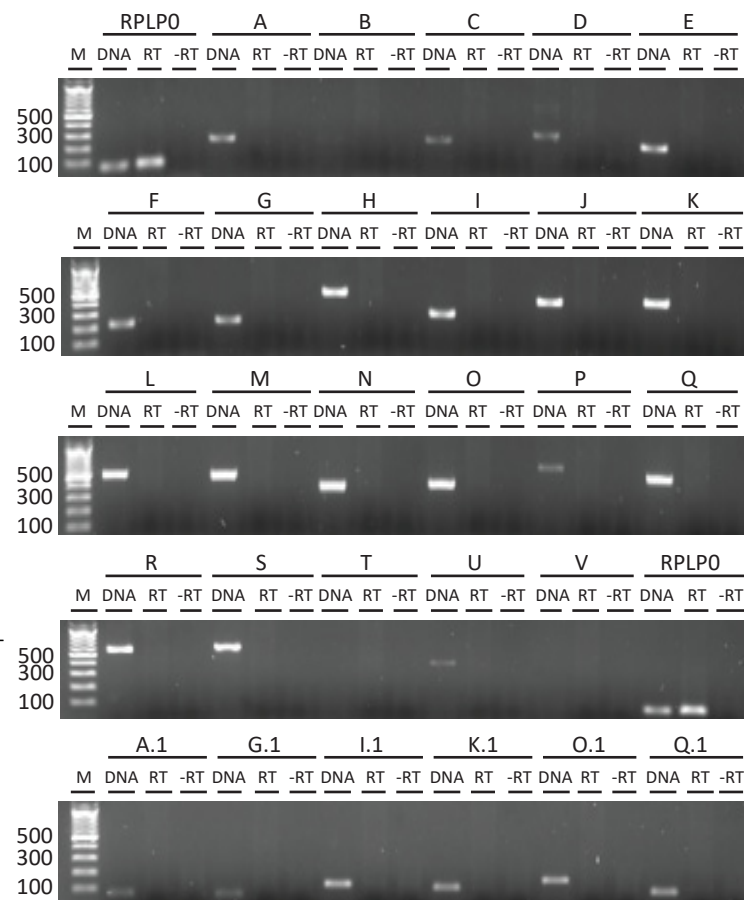**d**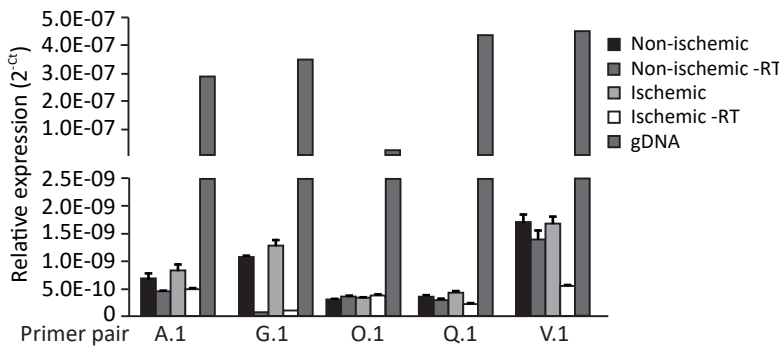

**Supplementary Figure 3: Embryonal transcripts from the mouse *Gata6-AS* locus are absent in mouse endothelial H5V cells and in muscle tissue.** **a** Schematic view of the mouse *Gata6/Gata6-AS* locus on chromosome 18 (GRCm38/mm10). The first exon of *Gata6* is shown in red, putative *Gata6-AS* transcripts in white. Primer pairs (A-Q.1) used to cover the locus by RT-PCR are shown at the top. **b** Expression of putative *Gata6-AS* transcripts was assayed by RT-qPCR using different primer pairs (A.1-V.1). RNA was derived from embryonic hearts (Swiss mice; E12.5) and data was normalized to RPLP0 mRNA. Left: Relative expression levels. Right:  $2^{-\Delta Ct}$ , Ct and -RT Ct values ( $n=1$ ). **c** Expression of putative mouse *Gata6-AS* transcripts was assayed by semiquantitative RT-PCR in mouse endothelial H5V cells. DNase-digested total RNA was reverse transcribed and subjected to PCR using the indicated primer pairs. RPLP0 served as positive control for RT reaction, genomic DNA as controls for primer functionality and -RT reactions as negative controls ( $n=1$ ). **d** Expression of putative *Gata6-AS* transcripts was assayed by RT-qPCR in non-ischemic and ischemic muscle from adult mice 21 days after induction of ischemia, using the indicated primer pairs ( $n=3$  mice per condition; SEM).

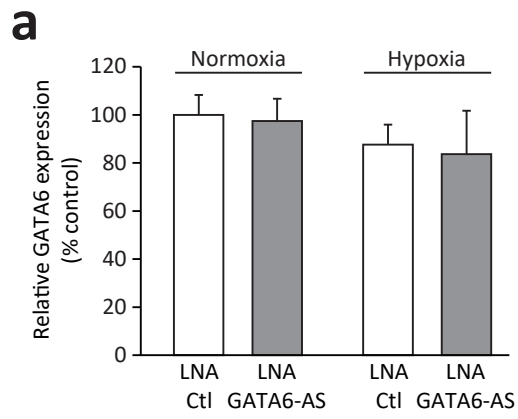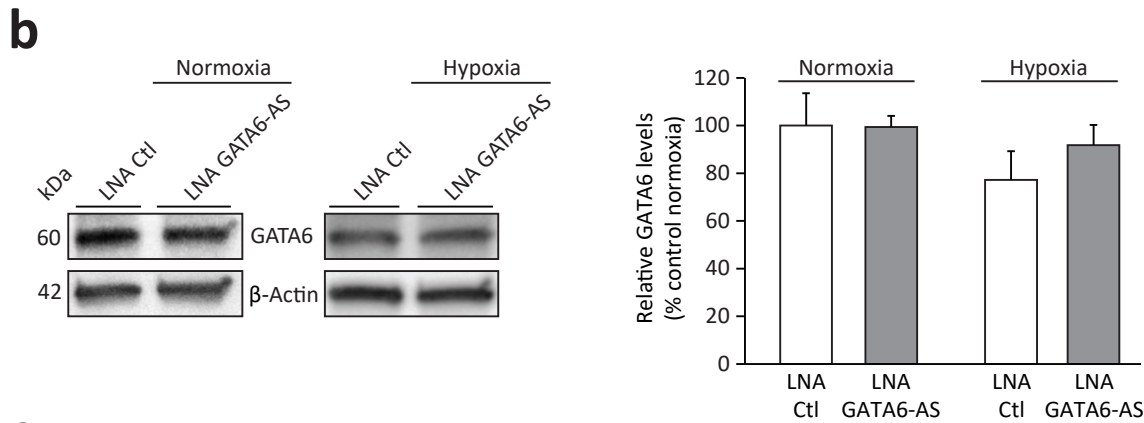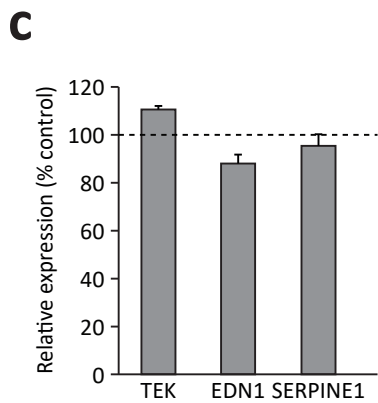

**Supplementary Figure 4: GATA6-AS has no *cis*-regulatory function. a, b, c** GATA6-AS expression was silenced in HUVECs by GapmeR transfection. **a** HUVECs were exposed to hypoxic (0.2% O<sub>2</sub>) or normoxic control conditions for 24h. The relative expression of GATA6 mRNA was determined by RT-qPCR and expression values were normalized to RPLP0 mRNA ( $n=3$ ; SEM). **b** HUVECs were exposed to hypoxic (0.2% O<sub>2</sub>) or normoxic control conditions for 24h. Left: GATA6 protein levels were assayed by western blotting (representative images are shown). Right: Quantification of GATA6 protein levels, normalized to  $\beta$ -Actin ( $n=6$ ; SEM). **c** Relative expression of the GATA6 target genes TEK, EDN1, and SERPINE1 was determined by RT-qPCR. Expression levels were normalized to RPLP0 mRNA ( $n=3$ ; SEM).

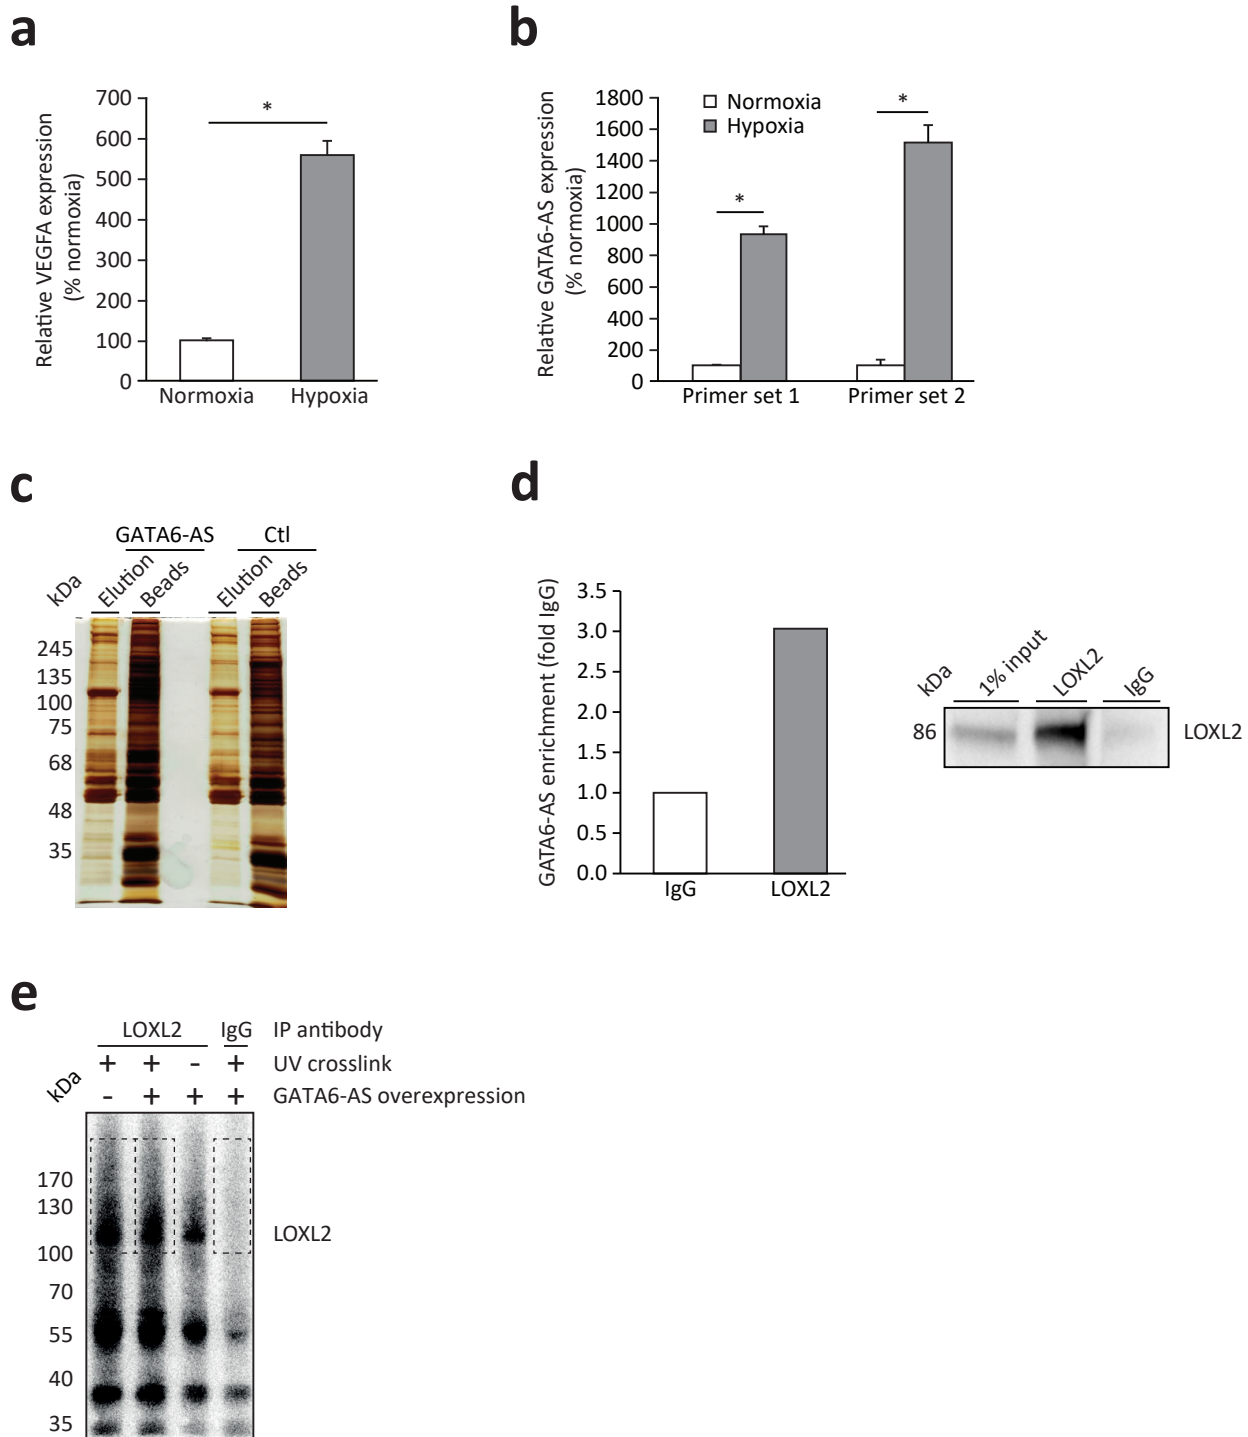

**Supplementary Figure 5: GATA6-AS is hypoxia-induced and interacts with LOXL2.** **a** Hypoxic conditions (24h, 0.2% O<sub>2</sub>) in HeLa cells were assayed by RT-qPCR using primers targeting VEGFA. Expression was normalized to RPLP0 mRNA ( $n=4$ ; SEM; \*  $t$ -test  $p<0.05$ ). **b** Regulation of GATA6-AS in HeLa cells by hypoxia (24h, 0.2% O<sub>2</sub>) was confirmed by RT-qPCR, using two primer sets targeting GATA6-AS. Values were normalized to RPLP0 mRNA ( $n=4$ ; SEM; \*  $t$ -test  $p<0.05$ ). **c** Eluates and beads fractions of endogenous GATA6-AS-protein-complexes isolated from HeLa cell lysate by 2'O-Me-RNA affinity selection were analyzed by SDS PAGE and silver staining. As control, scrambled 2'O-Me-RNA probes were used for affinity selection ( $n=7$ ; a representative image is shown). **d** HUVECs were exposed to hypoxia (24h, 0.2% O<sub>2</sub>) and UV<sub>254</sub>-irradiated. Cell lysate was used for RNA immunoprecipitation using LOXL2 antibodies or IgG isotype controls. Left: Co-purified RNA was assayed for GATA6-AS enrichment by RT-qPCR. Right: IP specificity was controlled by LOXL2 western blotting ( $n=1$ ). **e** Autoradiography of LOXL2-iCLIP membrane with bound <sup>32</sup>P-labeled RNA-protein-complexes comparing UV-irradiation, GATA6-AS overexpression, LOXL2 and isotype control immunoprecipitated material from HUVEC cell lysate. Boxed regions were cut out and subjected to RNA isolation and library preparation ( $n=1$ ).

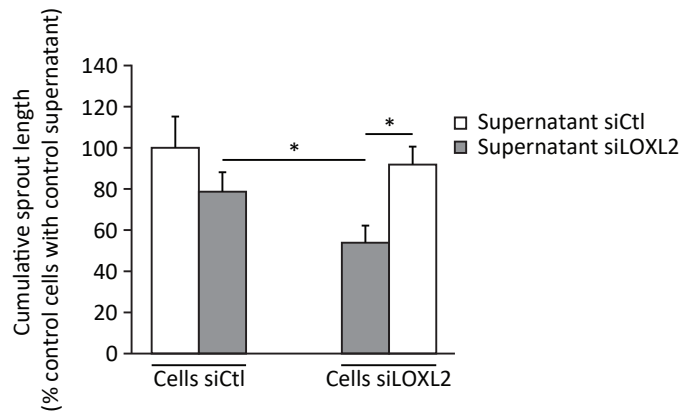

**Supplementary Figure 6: LOXL2 sprouting phenotype is driven by an extracellular depletion of LOXL2.**

LOXL2-silenced cells or control cells were used for *in vitro* spheroid sprouting assays in the presence of supernatants from control or siLOXL2 treated cells. Therefore, supernatant derived from control cells or LOXL2-silenced cells was collected, concentrated by ultracentrifugation and incubated with the respective spheroids (see labels below bar graph) during sprout formation ( $n=6$ ; SEM; \*  $t$ -test  $p<0.05$ ).

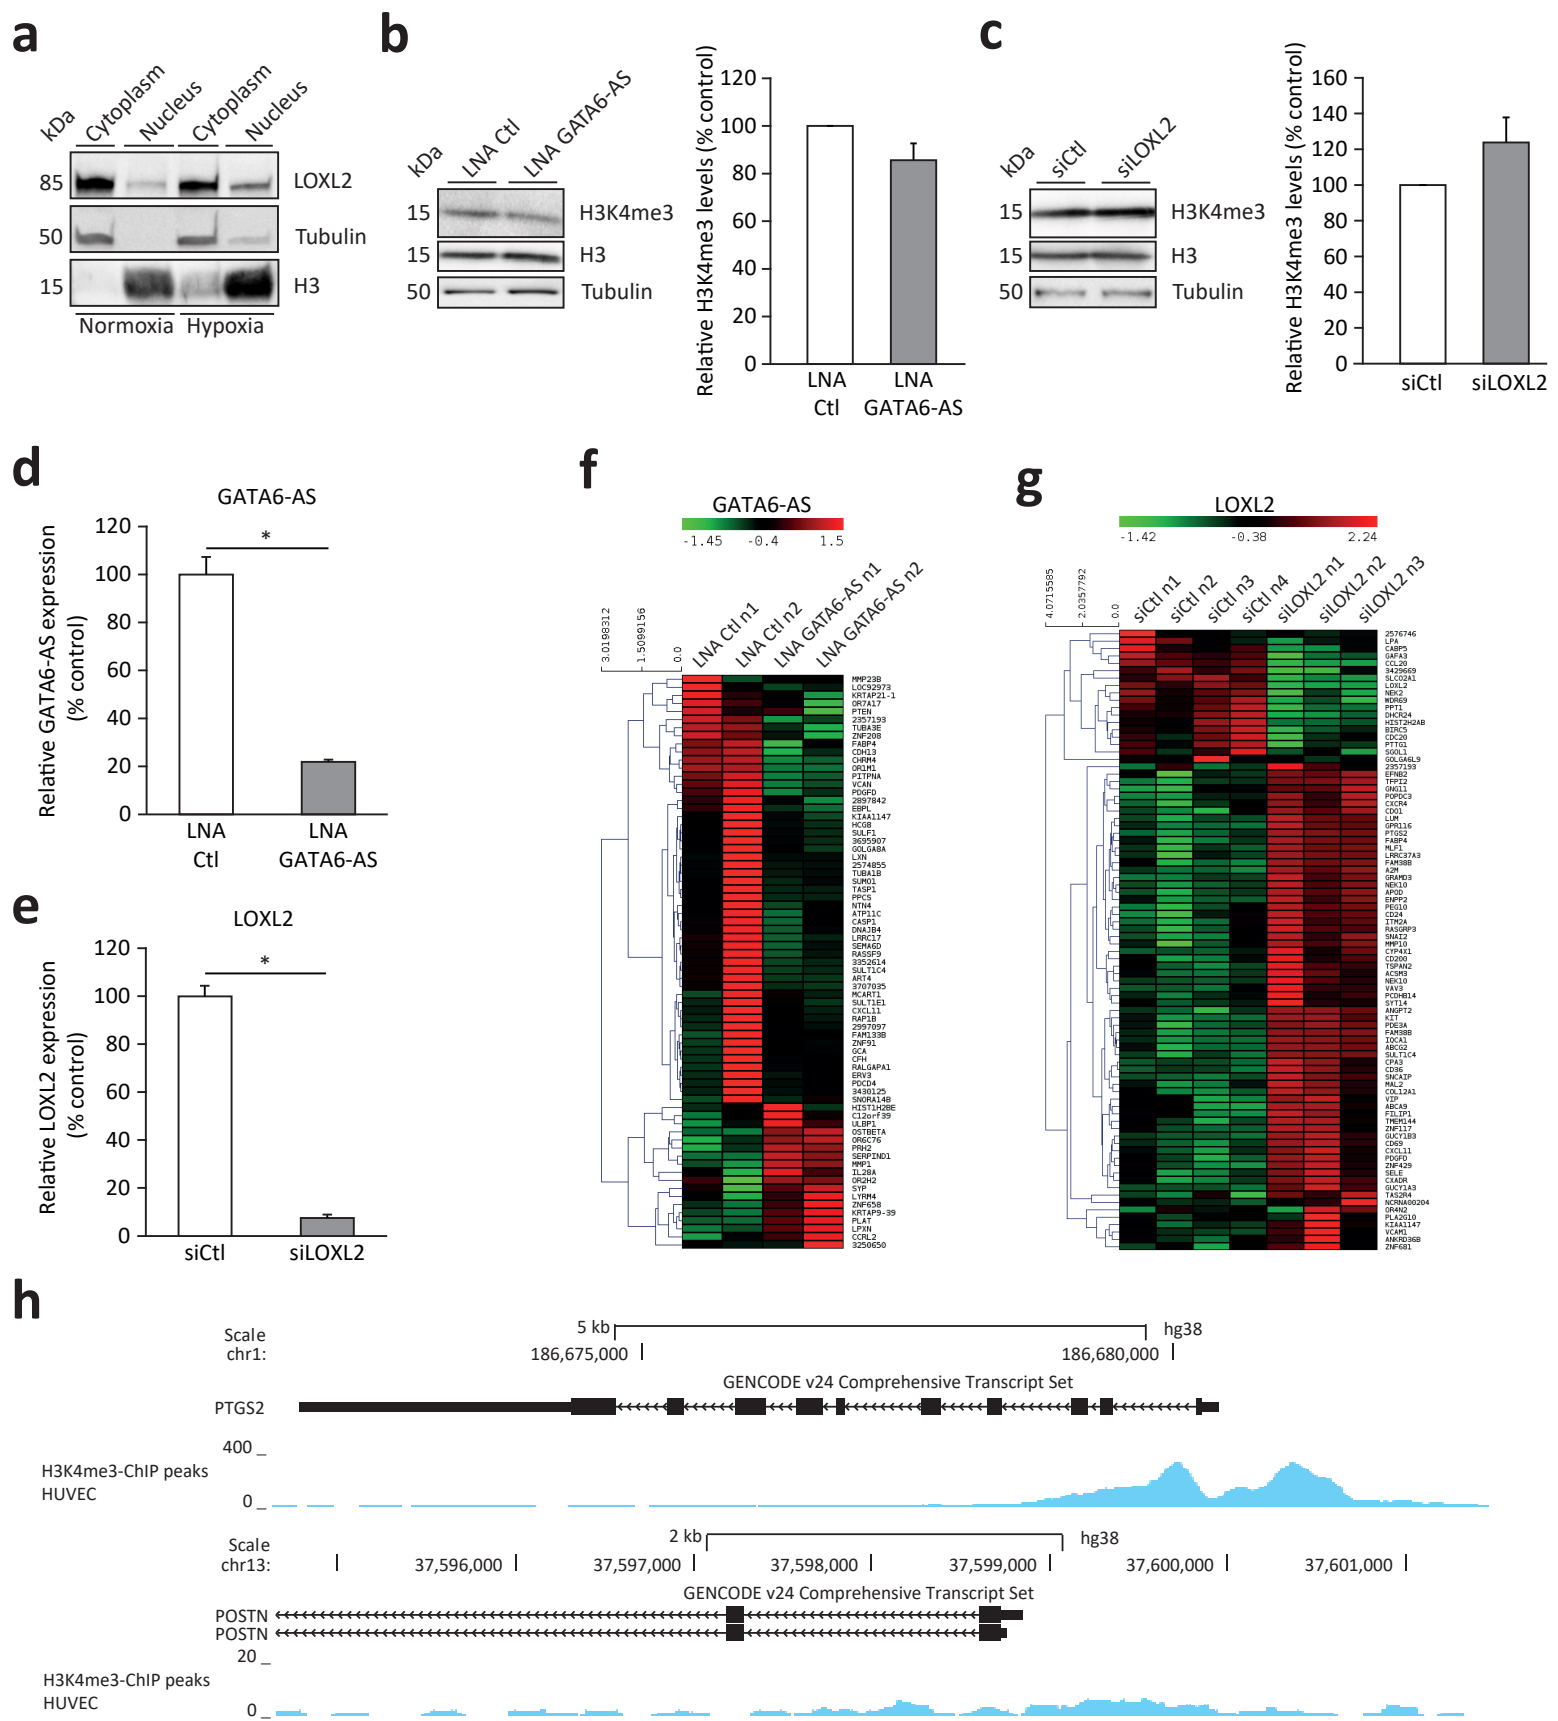

**Supplementary Figure 7: GATA6-AS acts as negative regulator of nuclear LOXL2 function in endothelial cells.** **a** HUVECs were exposed to hypoxia (0.2% O<sub>2</sub>) or kept under normoxic conditions and LOXL2 levels of cytoplasmic and nuclear fractions were analyzed by western blotting. Tubulin and H3 were used as cytoplasmic and nuclear markers, respectively ( $n=3$ ; representative images are shown). **b, c** HUVECs were transfected with GapmeRs or siRNAs targeting GATA6-AS or LOXL2, respectively and exposed to hypoxia (24h, 0.2% O<sub>2</sub>). Left: H3K4me3, H3 as well as tubulin levels were assayed by western blotting (representative images are shown). Right: For quantification, H3K4me3 levels were normalized to tubulin ( $n=3-6$ ; SEM). **d, e** HUVECs were transfected with GapmeRs or siRNAs targeting GATA6-AS or LOXL2, respectively and relative expression of GATA6-AS or LOXL2 was determined by RT-qPCR. Expression levels were normalized to RPLP0 mRNA ( $n=3-6$ ; SEM; \*  $t$ -test  $p<0.05$ ). **f, g** Gene expression profiling of GATA6-AS-silenced and LOXL2-silenced HUVECs ( $n=2-4$ ). **h** Snapshot of the human PTGS2 and POSTN locus with H3K4me3 ChIP-sequencing peaks, downloaded and modified from UCSC genome browser (Homo sapiens: GRCh38/hg38).

Figure 4a

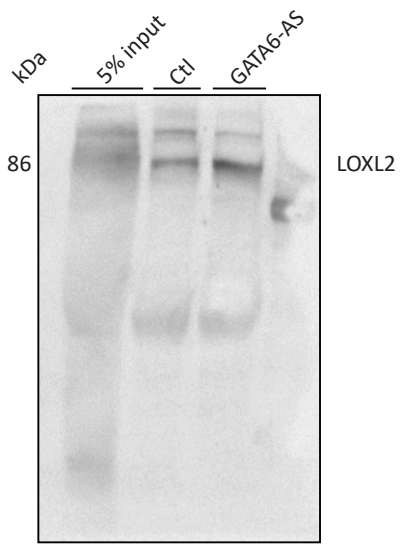

Figure 5d

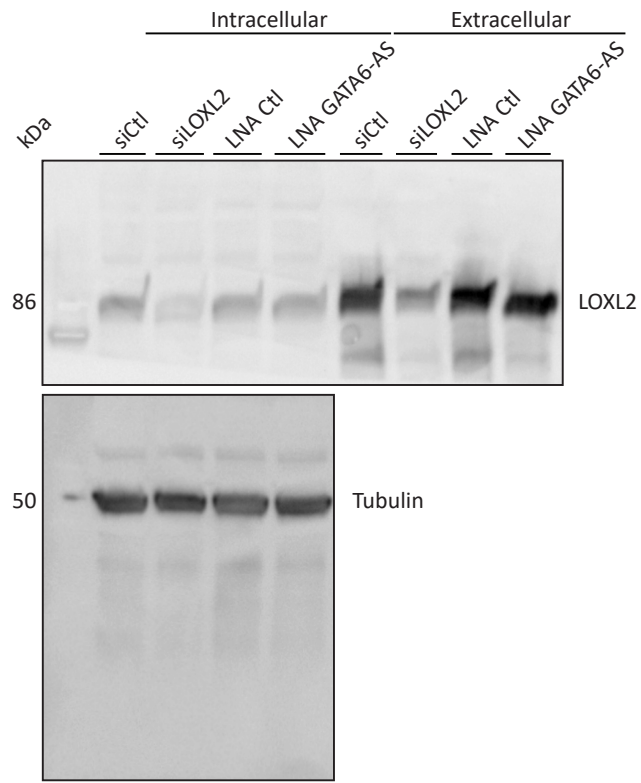

Figure 6a

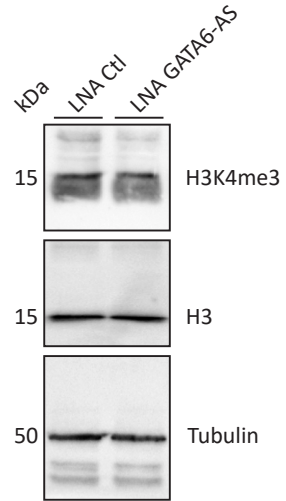

Figure 6b

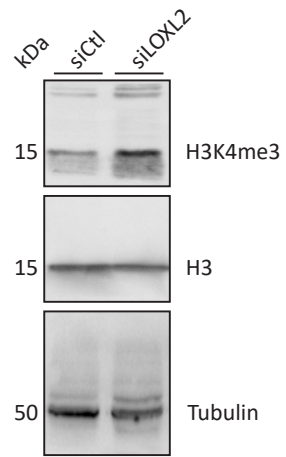

Supplementary Figure 8: Western blot images used to compose result panels in indicated main figures.



Supplementary Figure 1f

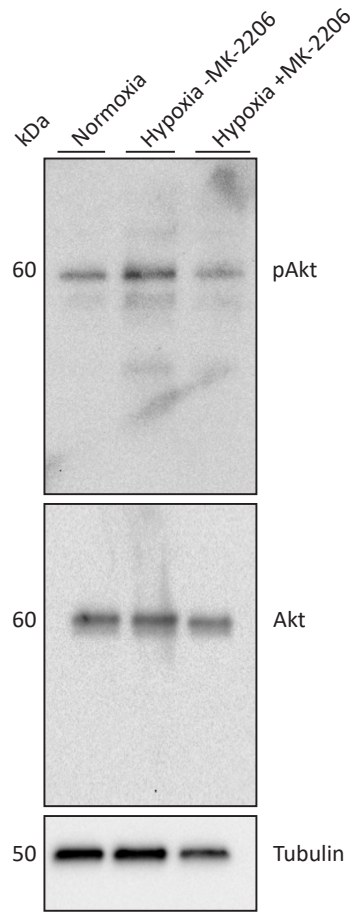

Supplementary Figure 7a

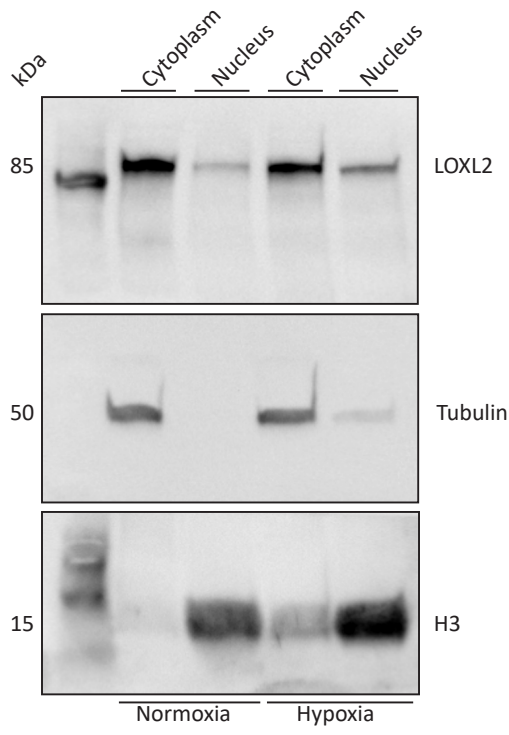

Supplementary Figure 7b

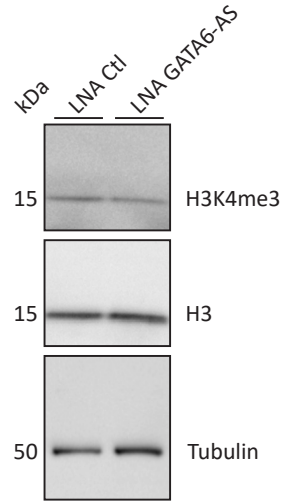

Supplementary Figure 7c

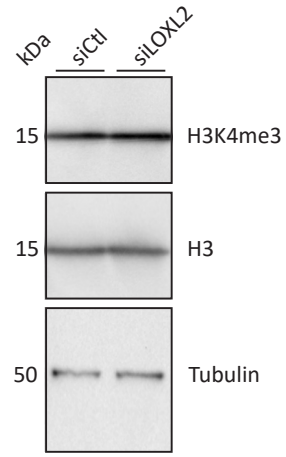

Supplementary Figure 9: Western blot images used to compose result panels in indicated supplementary figures.

**Supplementary Table 1: Hypoxia-regulated lncRNAs in endothelial cells.** HUVECs were cultured under hypoxic (24h, 0.2% O<sub>2</sub>) or normoxic conditions and gene expression changes were assayed by deep sequencing of ribonucleic acid. Significantly regulated lncRNAs are shown in descending order.

| Short name                        | Locus (GRCh37/hg19)         | FPKM (log <sub>2</sub> ) |             |             |             | Ratio norm/hyp (log <sub>2</sub> ) | p value       |
|-----------------------------------|-----------------------------|--------------------------|-------------|-------------|-------------|------------------------------------|---------------|
|                                   |                             | Normoxia 24h             |             | Hypoxia 24h |             |                                    |               |
|                                   |                             | n1                       | n2          | n1          | n2          |                                    |               |
| H19,MIR675                        | 11:2016405-2022700          | 0.77                     | 0.56        | 4.32        | 8.41        | 3.26                               | 0.0001        |
| MIR210HG                          | 11:565659-568457            | 2.02                     | 2.26        | 16.06       | 17.55       | 2.97                               | 0.0001        |
| RP11-923111.1                     | 12:52203488-52206648        | 0.56                     | 0.33        | 2.97        | 2.75        | 2.69                               | 0.0001        |
| <b>GATA6-AS / RP11-627G18.3</b>   | <b>18:19746858-19748929</b> | <b>0.42</b>              | <b>0.40</b> | <b>2.10</b> | <b>3.03</b> | <b>2.64</b>                        | <b>0.0002</b> |
| XIST                              | X:73040485-73072588         | 0.61                     | 2.83        | 2.18        | 18.70       | 2.60                               | 0.0001        |
| AC004383.4,MIR424                 | X:133677366-133680741       | 8.77                     | 6.62        | 55.22       | 38.13       | 2.60                               | 0.0001        |
| AC009236.1                        | 2:45392008-45550434         | 0.23                     | 0.56        | 0.30        | 4.38        | 2.55                               | 0.0010        |
| AC009404.2                        | 2:118591512-118599234       | 0.31                     | 0.37        | 1.51        | 1.87        | 2.33                               | 0.0010        |
| LINC00342                         | 2:96472865-96481963         | 0.55                     | 0.42        | 1.69        | 2.86        | 2.24                               | 0.0001        |
| AC083843.1                        | 8:135804262-135810515       | 0.27                     | 0.18        | 0.94        | 1.18        | 2.24                               | 0.0001        |
| RP11-379B18.5                     | 3:125546080-125629115       | 0.23                     | 0.28        | 1.00        | 1.27        | 2.18                               | 0.0018        |
| MEG3                              | 14:101245746-101327368      | 12.84                    | 15.27       | 54.79       | 69.62       | 2.15                               | 0.0001        |
| MALAT1                            | 11:65265232-65273940        | 211.71                   | 169.01      | 570.41      | 942.98      | 1.99                               | 0.0001        |
| NEAT1                             | 11:65190244-65213011        | 16.57                    | 10.15       | 33.09       | 70.10       | 1.95                               | 0.0001        |
| RP11-48B3.4                       | 8:81453534-81455339         | 0.37                     | 0.43        | 1.30        | 1.69        | 1.91                               | 0.0001        |
| RP1-67M12.2                       | 6:22135185-22147422         | 0.21                     | 0.32        | 0.76        | 1.16        | 1.86                               | 0.0014        |
| AC012065.7                        | 2:20877568-20879005         | 3.19                     | 2.43        | 11.07       | 9.06        | 1.84                               | 0.0001        |
| MEG9                              | 14:101536247-101539274      | 0.68                     | 0.30        | 1.21        | 2.21        | 1.80                               | 0.0027        |
| RP11-48B3.3                       | 8:81447240-81451370         | 0.25                     | 0.30        | 0.86        | 1.05        | 1.79                               | 0.0002        |
| RP11-9G1.3                        | 4:133996465-134070271       | 1.25                     | 1.13        | 4.42        | 3.81        | 1.79                               | 0.0016        |
| RP11-553L6.5                      | 3:114033347-114035026       | 0.53                     | 0.69        | 1.84        | 2.22        | 1.74                               | 0.0001        |
| RP11-354K1.1                      | 1:211809247-211827923       | 0.86                     | 0.45        | 2.35        | 2.04        | 1.74                               | 0.0011        |
| RP5-1057J7.6                      | 1:23607801-23613245         | 0.62                     | 0.65        | 1.58        | 2.54        | 1.69                               | 0.0001        |
| RP11-222A11.1                     | 10:67330207-67526299        | 0.94                     | 0.45        | 1.27        | 3.15        | 1.68                               | 0.0001        |
| LINC00115                         | 1:761585-762902             | 0.56                     | 0.18        | 1.00        | 1.33        | 1.66                               | 0.0049        |
| RP11-31E23.1                      | 1:198776621-198906558       | 1.15                     | 2.06        | 2.82        | 7.08        | 1.62                               | 0.0005        |
| RP5-1070A16.1                     | 1:98676302-98738214         | 0.40                     | 0.37        | 0.79        | 1.61        | 1.62                               | 0.0006        |
| RP11-361F15.2                     | 6:147708799-147711601       | 0.33                     | 0.46        | 1.13        | 1.20        | 1.56                               | 0.0043        |
| AC156455.1                        | 12:122501211-122506522      | 2.87                     | 3.49        | 8.47        | 9.05        | 1.46                               | 0.0005        |
| ZNF518A                           | 10:97889471-98031333        | 2.58                     | 2.56        | 5.34        | 8.42        | 1.42                               | 0.0001        |
| AF127936.7                        | 21:16195016-16254296        | 1.84                     | 1.25        | 4.43        | 3.71        | 1.40                               | 0.0020        |
| CTC-428G20.3                      | 5:114539712-114541943       | 0.55                     | 0.36        | 0.85        | 1.51        | 1.38                               | 0.0018        |
| RP11-158H5.7,ZSCAN30              | 18:32820993-32870196        | 4.11                     | 4.94        | 10.15       | 12.72       | 1.34                               | 0.0001        |
| RP11-37B2.1                       | 8:90621628-90769955         | 2.25                     | 1.42        | 4.41        | 4.73        | 1.32                               | 0.0011        |
| SH3RF3-AS1                        | 2:109743782-109745386       | 0.97                     | 1.19        | 2.28        | 3.07        | 1.31                               | 0.0008        |
| AC007204.2,ZNF93                  | 19:20011721-20074273        | 1.52                     | 2.31        | 2.79        | 6.46        | 1.27                               | 0.0031        |
| RP11-373L24.1                     | 2:61153043-61155287         | 0.90                     | 0.61        | 1.50        | 2.10        | 1.25                               | 0.0009        |
| CTC-444N24.8                      | 19:57772721-57774106        | 1.06                     | 1.54        | 2.68        | 3.48        | 1.24                               | 0.0009        |
| MIR4720                           | 16:81416873-81424489        | 1.63                     | 1.66        | 4.11        | 3.47        | 1.21                               | 0.0004        |
| CTC-444N24.11                     | 19:57815672-57819930        | 3.52                     | 3.82        | 7.88        | 8.67        | 1.17                               | 0.0001        |
| RP11-121C2.2                      | 4:47842138-47846356         | 0.33                     | 0.30        | 0.49        | 0.90        | 1.14                               | 0.0040        |
| FTX                               | X:73467698-73513362         | 9.16                     | 8.54        | 17.62       | 21.00       | 1.13                               | 0.0006        |
| HCG11                             | 6:26522075-26526807         | 1.43                     | 1.45        | 3.14        | 3.11        | 1.12                               | 0.0001        |
| MIRLET7DHG                        | 9:96938883-96966818         | 2.52                     | 2.27        | 4.11        | 6.00        | 1.08                               | 0.0007        |
| RP11-890B15.3                     | 11:130736148-130740142      | 0.67                     | 0.81        | 1.26        | 1.83        | 1.06                               | 0.0009        |
| LINC00472                         | 6:72054046-72130472         | 1.73                     | 2.60        | 3.31        | 5.21        | 0.98                               | 0.0048        |
| RP3-523C21.1                      | 6:132453054-132490514       | 72.06                    | 57.09       | 134.26      | 117.73      | 0.96                               | 0.0001        |
| LINC00657                         | 20:34633543-34638882        | 64.36                    | 64.90       | 126.05      | 125.58      | 0.96                               | 0.0001        |
| RP11-220I1.1                      | 9:37079892-37090398         | 9.14                     | 8.51        | 15.60       | 18.53       | 0.95                               | 0.0016        |
| AC017048.3                        | 2:177494567-177520686       | 10.48                    | 8.71        | 19.90       | 16.79       | 0.93                               | 0.0001        |
| TUG1                              | 22:31366662-31374831        | 18.59                    | 17.16       | 28.42       | 33.62       | 0.80                               | 0.0016        |
| RP11-252A24.7                     | 16:74481324-74483790        | 9.03                     | 9.25        | 14.26       | 16.31       | 0.74                               | 0.0012        |
| RP1-140K8.5                       | 6:3905143-3912213           | 4.17                     | 3.80        | 6.77        | 6.41        | 0.73                               | 0.0005        |
| RP11-18F14.2                      | 16:80631802-80636416        | 6.58                     | 7.66        | 11.17       | 11.30       | 0.66                               | 0.0020        |
| RP11-159D12.2,RP11-159D12.5,SRSF1 | 17:56066398-56084707        | 95.81                    | 102.37      | 59.76       | 64.97       | -0.67                              | 0.0016        |
| RP11-327L3.1                      | 9:35909479-35911683         | 4.61                     | 6.98        | 2.12        | 3.95        | -0.93                              | 0.0020        |
| CTD-2292M16.8,TTC5                | 14:20724716-20774970        | 12.94                    | 19.74       | 7.24        | 9.45        | -0.97                              | 0.0020        |
| DANCR                             | 4:53578596-53586998         | 66.32                    | 54.72       | 33.25       | 26.74       | -1.01                              | 0.0001        |
| RP11-1094M14.11                   | 17:33895138-33901811        | 3.67                     | 3.58        | 1.40        | 1.87        | -1.15                              | 0.0014        |
| LINC00116                         | 2:110969105-111043433       | 46.38                    | 45.35       | 23.75       | 17.23       | -1.16                              | 0.0001        |
| RP11-253E3.3                      | 12:3150602-3154116          | 2.17                     | 2.17        | 0.89        | 0.93        | -1.25                              | 0.0003        |
| RP11-160E2.6                      | 17:19015312-19015949        | 26.46                    | 21.18       | 8.61        | 9.76        | -1.37                              | 0.0001        |
| SNORD3B-2                         | 17:18966761-18967449        | 23.08                    | 30.27       | 7.66        | 11.54       | -1.47                              | 0.0001        |
| RP11-184M15.1                     | 4:129489126-129491686       | 3.47                     | 4.81        | 0.47        | 1.03        | -2.46                              | 0.0001        |

**Supplementary Table 2: *In silico* analysis of GATA6-AS coding potential.** All annotated splice variants of GATA6-AS were analyzed regarding their protein coding probabilities using the coding potential assessment tool CPAT (<http://rna-cpat.sourceforge.net/>). Analysis was done using default settings for human sequences and coding probabilities below 0.364 were considered non-coding.

| <b>Transcript variant</b> | <b>RNA size</b> | <b>ORF size</b> | <b>Ficket score</b> | <b>Hexamer score</b> | <b>Coding probability</b> | <b>Coding label</b> |
|---------------------------|-----------------|-----------------|---------------------|----------------------|---------------------------|---------------------|
| GATA6-AS1-001             | 1788            | 249             | 0.602               | 0.109                | 0.052                     | no                  |
| GATA6-AS1-002             | 669             | 279             | 0.696               | 0.034                | 0.062                     | no                  |
| GATA6-AS1-003             | 481             | 153             | 0.770               | 0.189                | 0.057                     | no                  |
| GATA6-AS1-004             | 194             | 48              | 0.533               | -0.297               | 0.000                     | no                  |

**Supplementary Table 3: Proteins identified by mass spectrometry in GATA6-AS affinity selections.** Endogenous GATA6-AS-protein-complexes were targeted by RNA affinity selection using 2'O-Me-RNA oligos and co-purified proteins were analyzed by mass spectrometry. As controls, scrambled oligos were used and proteins with unique peptide values  $\geq 8$  were considered for further evaluation.  $\log_2$  fold changes over control selections were calculated ( $\text{LFQ}_{\text{GATA6-AS}} - \text{LFQ}_{\text{Ctl}}$ ), comparing total enrichment and enrichment in UV<sub>254</sub>-irradiated samples and values were shaded largest (red) to smallest (orange). Identified proteins were analyzed for the indicated GO-term assignments and highlighted in yellow when applicable. Data are  $n=7$ .

| $\log_2$<br>fold change<br>(total) | $\log_2$<br>fold change<br>(crosslink only) | Gene names    | Protein names                                               | Unique<br>peptides | Nucleic acid<br>binding | Response to<br>hypoxia | Sprouting<br>angiogenesis | Histone<br>modification |
|------------------------------------|---------------------------------------------|---------------|-------------------------------------------------------------|--------------------|-------------------------|------------------------|---------------------------|-------------------------|
| 68.46                              | 44.33                                       | LOXL2         | Lysyl oxidase homolog 2                                     | 20                 |                         |                        |                           |                         |
| 64.66                              | 48.92                                       | MAGEB2        | Melanoma-associated antigen B2                              | 9                  |                         |                        |                           |                         |
| 63.25                              | 27.32                                       | CTSB          | Cathepsin B;Cathepsin B light chain;Cathepsin B heavy chain | 10                 |                         |                        |                           |                         |
| 61.81                              | 23.76                                       | TBRG4         | Protein TBRG4                                               | 17                 |                         |                        |                           |                         |
| 57.44                              | 22.04                                       | KPNA2         | Importin subunit alpha-1                                    | 16                 |                         |                        |                           |                         |
| 51.47                              | 25.49                                       | COPB2         | Coatmer subunit beta                                        | 38                 |                         |                        |                           |                         |
| 50.38                              | 27.61                                       | FLNA          | Filamin-A                                                   | 67                 |                         |                        |                           |                         |
| 50.33                              | 23.45                                       | ARCNI         | Coatmer subunit delta                                       | 30                 |                         |                        |                           |                         |
| 49.32                              | 24.71                                       | FLNC          | Filamin-C                                                   | 79                 |                         |                        |                           |                         |
| 40.66                              | 28.70                                       | PTBP1         | Polypyrimidine tract-binding protein 1                      | 18                 |                         |                        |                           |                         |
| 38.58                              | 23.71                                       | POP1          | Ribonucleases P/MRP protein subunit POP1                    | 21                 |                         |                        |                           |                         |
| 38.40                              | 25.72                                       | CLTC          | Clathrin heavy chain 1                                      | 35                 |                         |                        |                           |                         |
| 38.24                              | 27.12                                       | GRSF1         | G-rich sequence factor 1                                    | 11                 |                         |                        |                           |                         |
| 38.09                              | 24.69                                       | BRIX1         | Ribosome biogenesis protein BRX1 homolog                    | 19                 |                         |                        |                           |                         |
| 37.37                              | 24.78                                       | SEC22B        | Vesicle-trafficking protein SEC22b                          | 10                 |                         |                        |                           |                         |
| 32.42                              | 2.97                                        | CCT2          | T-complex protein 1 subunit beta                            | 33                 |                         |                        |                           |                         |
| 29.41                              | 3.30                                        | POLR3B        | DNA-directed RNA polymerase III subunit RPC2                | 24                 |                         |                        |                           |                         |
| 28.74                              | 26.46                                       | TALDO1        | Transaldolase                                               | 11                 |                         |                        |                           |                         |
| 26.48                              | 23.94                                       | POLR2E        | DNA-directed RNA polymerases I, II, and III subunit RPABC1  | 10                 |                         |                        |                           |                         |
| 25.49                              | 23.95                                       | RAN           | GTP-binding nuclear protein Ran                             | 9                  |                         |                        |                           |                         |
| 25.39                              | 1.27                                        | VPS35         | Vacuolar protein sorting-associated protein 35              | 25                 |                         |                        |                           |                         |
| 24.75                              | 23.54                                       | AK4           | Adenylate kinase 4, mitochondrial                           | 10                 |                         |                        |                           |                         |
| 22.95                              | 21.13                                       | PSMD1         | 26S proteasome non-ATPase regulatory subunit 1              | 46                 |                         |                        |                           |                         |
| 19.11                              | 4.80                                        | ILF2          | Interleukin enhancer-binding factor 2                       | 17                 |                         |                        |                           |                         |
| 17.63                              | 3.77                                        | MYBBP1A       | Myb-binding protein 1A                                      | 38                 |                         |                        |                           |                         |
| 17.31                              | 4.71                                        | ENO1          | Alpha-enolase                                               | 19                 |                         |                        |                           |                         |
| 16.93                              | 0.67                                        | EIF6          | Eukaryotic translation initiation factor 6                  | 8                  |                         |                        |                           |                         |
| 16.72                              | 2.58                                        | ELAVL1        | ELAV-like protein 1                                         | 11                 |                         |                        |                           |                         |
| 13.77                              | 0.63                                        | PDHA1         | Pyruvate dehydrogenase E1 component subunit alpha           | 9                  |                         |                        |                           |                         |
| 9.20                               | 2.35                                        | PWP1          | Periodic tryptophan protein 1 homolog                       | 20                 |                         |                        |                           |                         |
| 9.05                               | 4.02                                        | COLGALT1      | Procollagen galactosyltransferase 1                         | 23                 |                         |                        |                           |                         |
| 7.29                               | 3.42                                        | TFRC          | Transferrin receptor protein 1                              | 26                 |                         |                        |                           |                         |
| 6.35                               | 2.65                                        | RPL8          | 60S ribosomal protein L8                                    | 19                 |                         |                        |                           |                         |
| 6.35                               | 0.70                                        | CDC73         | Parafibromin                                                | 28                 |                         |                        |                           |                         |
| 5.81                               | 1.47                                        | NPEPPS        | Puromycin-sensitive aminopeptidase                          | 42                 |                         |                        |                           |                         |
| 5.26                               | 2.66                                        | IDH1          | Isocitrate dehydrogenase [NADP] cytoplasmic                 | 21                 |                         |                        |                           |                         |
| 5.26                               | 3.41                                        | EEF2          | Elongation factor 2                                         | 43                 |                         |                        |                           |                         |
| 5.13                               | 0.23                                        | CCT3          | T-complex protein 1 subunit gamma                           | 35                 |                         |                        |                           |                         |
| 4.75                               | 2.23                                        | RPL5          | 60S ribosomal protein L5                                    | 21                 |                         |                        |                           |                         |
| 4.38                               | 2.25                                        | GAPDH         | Glyceraldehyde-3-phosphate dehydrogenase                    | 18                 |                         |                        |                           |                         |
| 3.54                               | 1.89                                        | EIF4A1        | Eukaryotic initiation factor 4A-I                           | 22                 |                         |                        |                           |                         |
| 2.52                               | 1.77                                        | RPLP0;RPLP0P6 | 60S acidic ribosomal protein P0                             | 20                 |                         |                        |                           |                         |
| 1.74                               | 0.80                                        | AIFM1         | Apoptosis-inducing factor 1, mitochondrial                  | 25                 |                         |                        |                           |                         |

**Supplementary Table 4: Silencing of GATA6-AS diminishes the expression of hypoxia- and angiogenesis-related transcripts in endothelial cells.** Genes found to be inversely regulated upon GATA6-AS and LOXL2 silencing were assayed for the GO-terms “positive regulation of angiogenesis” as well as “response to hypoxia”. Changes in expression levels upon GATA6-AS and LOXL2 silencing are shown.

| Description                                    | Gene name | Fold Ctl |         |
|------------------------------------------------|-----------|----------|---------|
|                                                |           | LNA      |         |
|                                                |           | GATA6-AS | siLOXL2 |
| Prostaglandin G/H synthase 2                   | PTGS2     | -1.49    | 2.76    |
| Rho-related GTP-binding protein RhoB           | RHOB      | -1.35    | 1.32    |
| Neurofibromin                                  | NF1       | -1.33    | 1.09    |
| Signal transducer CD24                         | CD24      | -1.32    | 2.09    |
| C-C motif chemokine 2                          | CCL2      | -1.31    | 1.21    |
| Intercellular adhesion molecule 1              | ICAM1     | -1.30    | 1.09    |
| Homeobox protein Meis1                         | MEIS1     | -1.29    | 1.29    |
| Peptidyl-glycine alpha-amidating monooxygenase | PAM       | -1.29    | 1.30    |
| Serine/threonine-protein kinase D1             | PRKD1     | -1.28    | 1.42    |
| Hematopoietic progenitor cell antigen CD34     | CD34      | -1.28    | 1.54    |
| Interleukin-8                                  | IL8       | -1.28    | 1.15    |
| Apoptotic protease-activating factor 1         | APAF1     | -1.27    | 1.41    |
| Sushi repeat-containing protein SRPX2          | SRPX2     | -1.26    | 1.12    |
| Vascular cell adhesion protein 1               | VCAM1     | -1.25    | 2.59    |
| Periostin                                      | POSTN     | -1.23    | 1.43    |
| Cellular tumor antigen p53                     | TP53      | -1.23    | 1.07    |
| Vascular endothelial growth factor receptor 1  | FLT1      | -1.22    | 1.44    |
| TGF-beta receptor type-2                       | TGFBR2    | -1.22    | 1.05    |
| Baculoviral IAP repeat-containing protein 2    | BIRC2     | -1.21    | 1.12    |
| Cysteinyl leukotriene receptor 2               | CYSLTR2   | -1.21    | 1.16    |
| Platelet-derived growth factor subunit B       | PDGFB     | -1.21    | 1.06    |

**Supplementary Table 5: Sequences of all oligonucleotides used in this study.**

| Name                                              | Sequence (5'-3')           |
|---------------------------------------------------|----------------------------|
| <i>LNA GapmeRs</i>                                |                            |
| LNA Ctl                                           | AACACGTCTATACGC            |
| LNA GATA6-AS                                      | TCGGTAGCAATTTAA            |
| LNA GATA6-AS_alternative                          | AAAGGAGCAATCACTT           |
| <i>siRNAs</i>                                     |                            |
| siCtl                                             | CGUACGCGAAUACUUCGA[dT][dT] |
| siLOXL2                                           | CACAUAGGUGGUCCUUCA[dT][dT] |
| siHIF1 $\alpha$                                   | SASI_Hs02_00332063         |
| <i>Primers for RPLP0, GATA6-AS, H19, MALAT1</i>   |                            |
| RPLP0_f                                           | TCGACAATGGCAGCATCTAC       |
| RPLP0_r                                           | ATCCGTCTCCACAGACAAGG       |
| GATA6-AS_f_primer set 2                           | ATGCGCTTTTTGCCTGAAG        |
| GATA6-AS_r_primer set 2                           | AGGTCAGCTGGGAATGTTG        |
| GATA6-AS_f_primer set 1                           | ATTCCCCAGCTGACCTTTGG       |
| GATA6-AS_r_primer set 1                           | CGGACACGACTGATGTGGAA       |
| H19_f                                             | TCAAGCCTGGGCCTTGAAT        |
| H19_r                                             | GGCTGATGAGGTCTGGTTCC       |
| MALAT1_f                                          | GTGATGCGAGTTGTTCTCCG       |
| MALAT1_r                                          | CTGGCTGCCTCAATGCCTAC       |
| <i>Primers for VEGFA, HIF1<math>\alpha</math></i> |                            |
| VEGFA_f                                           | CCCTGATGAGATCGAGTACA       |
| VEGFA_r                                           | AGCAAGGCCACAGGGATTT        |
| HIF1 $\alpha$ _f                                  | GGCAGCAACGACACAGAAAC       |
| HIF1 $\alpha$ _r                                  | TTTTCGTTGGGTGAGGGGAG       |
| <i>Antisense oligos for RNase H cleavage</i>      |                            |
| GATA6-AS_RNaseH#1                                 | AAGCCCTTTTCCATTCTGCG       |
| GATA6-AS_RNaseH#2                                 | ACAACGCTTAGCTACGAGGT       |
| GATA6-AS_RNaseH#3                                 | CAGCCTGGACACAACTGAG        |
| GATA6-AS_RNaseH#4                                 | ATTCCAGAGTTTTCTACCTT       |
| GATA6-AS_RNaseH#5                                 | CTGTGACCATGAAAAGGAGC       |
| GATA6-AS_RNaseH#6                                 | AGACATCCTGTACTTGCAA        |
| GATA6-AS_RNaseH#7                                 | ACATTTGGTCGGAACCTACG       |
| GATA6-AS_RNaseH#8                                 | TAAGGTCGGTCTCACACAAC       |
| GATA6-AS_RNaseH#9                                 | CCTCGTTAGGTTGGAAAACCAG     |
| <i>Primers for RNase H cleavage</i>               |                            |
| GATA6-AS_RNaseH#1_f                               | CGGGTCGTCATGTACGGAAA       |
| GATA6-AS_RNaseH#1_r                               | GTCTCGGACACGACTGATG        |
| GATA6-AS_RNaseH#2_f                               | GGTGGAGAGGTGCCTTGTA        |
| GATA6-AS_RNaseH#2_r                               | ACTCACAGTTACGTGCAGAGG      |
| GATA6-AS_RNaseH#3_f                               | CGGAAATGGGTTGTGGGCAT       |
| GATA6-AS_RNaseH#3_r                               | CACAGGACAGAGATCAGGCTC      |



|                                                             |                            |
|-------------------------------------------------------------|----------------------------|
| <i>Primers for PTGS2, CYSLR2, VCAM1, POSTN, PLAT, LOXL2</i> |                            |
| PTGS2_f                                                     | TGAAACCCACTCCAAACACA       |
| PTGS2_r                                                     | TGTGATCTGGATGTCAACACA      |
| CYSLR2_f                                                    | GCAAGGTATGGAGAGTTCCTC      |
| CYSLR2_r                                                    | TGCTGTCTCTGTACACCTGA       |
| VCAM1_f                                                     | GACCACATCTACGCTGACAAT      |
| VCAM1_r                                                     | GAGGGCCACTCAAATGAATCT      |
| POSTN_f                                                     | GTTACAAGAAGAGGTCACCAAGG    |
| POSTN_r                                                     | AACTTCCTCACGGGTGTGT        |
| PLAT_f                                                      | TGTGGAGCAGTCTTCGTTTC       |
| PLAT_r                                                      | TTCATCTCTGCAGATCACTTGG     |
| LOXL2_f                                                     | CAGCGCTACTGGCCATTCT        |
| LOXL2_r                                                     | TCTGGCTTGACGCTTCCG         |
|                                                             |                            |
| <i>Primers for ChIP</i>                                     |                            |
| ChIP_PTGS2_f                                                | CGCTGCAAGAAGACGAAGAA       |
| ChIP_PTGS2_r                                                | TAAGTGCATTGTACCCGGA        |
| ChIP_POSTN_f                                                | CCGACCCCTGATACGACTAT       |
| ChIP_POSTN_r                                                | GGACTAACTGCAACGGAGAG       |
| ChIP_negative_control_f                                     | GGATGCTTTTGTAAAGCAAGTAACGA |
| ChIP_negative_control_r                                     | GCTGGGTGCACCACATTAATAC     |
|                                                             |                            |
| <i>Primers for EndMT</i>                                    |                            |
| SM22_f                                                      | AAGAATGATGGGCACTACCG       |
| SM22_r                                                      | ATGACATGCTTCCCTCCTG        |
| Calponin_f                                                  | CTGGCTGCAGCTTATTGATG       |
| Calponin_r                                                  | CTGAGAGAGTGGATCGAGGG       |
|                                                             |                            |
| <i>Primers for mouse Gata6-AS locus</i>                     |                            |
| mA_f                                                        | GAGCGATGTGCGAGAAGAAC       |
| mA_r                                                        | GTAGAGAGCAGTCCGACCC        |
| mB_f                                                        | AAACAAACAGCGCTAGCCGA       |
| mB_r                                                        | GTGGACTCGCTCTACTCTG        |
| mC_f                                                        | TCCTCAGAGTAGGAGCGAGT       |
| mC_r                                                        | CGGGGTCTATGAAGATCCAGC      |
| mD_f                                                        | GGAAACTTGGCTCGGAAGGA       |
| mD_r                                                        | TTTTAAGAGCAGGGGCGAGG       |
| mE_f                                                        | CTTTGGAATTCAACGCTCTGGG     |
| mE_r                                                        | AAAGCTCAGAGTGAACGCGA       |
| mF_f                                                        | TCGCGTTCACTCTGAGCTTT       |
| mF_r                                                        | GATAACCCCGCCAGTGTCA        |
| mG_f                                                        | TGATACGGTTCTTAGCGGGC       |
| mG_r                                                        | ATCCACTCCCACAAGAGTGT       |
| mH_f                                                        | TTCGACAAGCTGGACATTGG       |
| mH_r                                                        | ACGCAGTTAGGCAAGAACG        |
| mI_f                                                        | CGCGGCCAAACACTTCTAAA       |
| mI_r                                                        | TGGAAGCCGTGGTGGGAAT        |
| mJ_f                                                        | TACCACAAGAGACTGGCACG       |
| mJ_r                                                        | GGGGTTTGCTATTGTTCCAGG      |
|                                                             |                            |



|        |                           |
|--------|---------------------------|
| mK_f   | GAGCCTAGTTCAGTCCTGT       |
| mK_r   | AGTCAACCGGACAGGTTTATTT    |
| mL_f   | ACCTGTCCGGTTGACTAAGAC     |
| mL_r   | CTGCTGTGTTCCGGCTAGAT      |
| mN_f   | ACCAAACCACCACTTGCCCT      |
| mN_r   | GCGTGAGAATCGAACCCACA      |
| mM_f   | AGGATGTGGGTTGATTCTC       |
| mM_r   | ATTAGCTCTGAAGCCTGAGG      |
| mO_f   | GTGTTGGTTCTCTTCTGCCTG     |
| mO_r   | GGAGGGAAAATCTTTCGTCGG     |
| mP_f   | CCACCCAATGACCGACGAAA      |
| mP_r   | CCCAAGGGGATATGGAGTG       |
| mQ_f   | CAGAGAAGCACTCCATATCCCC    |
| mQ_r   | TGGAAAGTAAGCGATTTGGAAGGA  |
| mR_f   | CCTTCAAATCGCTTACTTTCCA    |
| mR_r   | GATCTGTTGATGAGTGGCAGGA    |
| mS_f   | GCTAAAGGGTTTGTCTACCACTG   |
| mS_r   | CTCACACACACACCTTGTAC      |
| mT_f   | AGGACAAACCAATGACTTCCAC    |
| mT_r   | GGCTTGAGAGAAGAGAAGAGTAGAG |
| mU_f   | GAAGAACCAATTTAAATTGATCTA  |
| mU_r   | AGAGAACAGGATTCTTCTTGT     |
| mV_f   | CCAAACCAGAAACAAGAAGATCCTG |
| mV_r   | TGGCCGTTCAAGTAGATTTAGGAG  |
| mA.1_f | GAGCCCTAAACAAACAGCGC      |
| mA.1_r | CCCAGCAGCTTGTAGAGAGC      |
| mG.1_f | GACATTGGAAGAAGGCTGCG      |
| mG.1_r | TCCTGTAAGAATCCACTCCCAC    |
| ml.1_f | GGAGAGACTAGCAGCTGGAAC     |
| ml.1_r | GACAACCCAAAGCAAGCCG       |
| mK.1_f | TGAGGAGTTCGACCCAAACG      |
| mK.1_r | GGTTTTCTGTGGTTGGAGGC      |
| mO.1_f | CGGTGGGAATCAAGCGGTAC      |
| mO.1_r | TAAGTACGTAAACAGCGCG       |
| mQ.1_f | AGCACTCCATATCCCCTTGG      |
| mQ.1_r | GAGAGTCTACACCCTTCTGG      |
| mV.1_f | TGCAGGGCTGGTTAAGATGG      |
| mV.1_r | CGGGGTTAAGTGTCTCGGTC      |
|        |                           |
|        |                           |
|        |                           |
|        |                           |

**Supplementary Table 6: Full-length and mutated sequence of GATA6-AS.**

| Full-length GATA6-AS (5'-3')                                                                                                                                                                                                                                                                                                                                                                                                                                                                                                                                                                                                                                                                                                                                                                                                                                                                                                                                                                                                                                                                                                                                                                                                                                                                                                                                                                                                                                                                                                                                                                                                                                                                                                                                                                                                                                                                                                                                                                                                                                                                           | Mutant GATA6-AS (5'-3')                                                                                                                                                                                                                                                                                                                                                                                                                                                                                                                                                                                                                                                                                                                                                                                                                                             |
|--------------------------------------------------------------------------------------------------------------------------------------------------------------------------------------------------------------------------------------------------------------------------------------------------------------------------------------------------------------------------------------------------------------------------------------------------------------------------------------------------------------------------------------------------------------------------------------------------------------------------------------------------------------------------------------------------------------------------------------------------------------------------------------------------------------------------------------------------------------------------------------------------------------------------------------------------------------------------------------------------------------------------------------------------------------------------------------------------------------------------------------------------------------------------------------------------------------------------------------------------------------------------------------------------------------------------------------------------------------------------------------------------------------------------------------------------------------------------------------------------------------------------------------------------------------------------------------------------------------------------------------------------------------------------------------------------------------------------------------------------------------------------------------------------------------------------------------------------------------------------------------------------------------------------------------------------------------------------------------------------------------------------------------------------------------------------------------------------------|---------------------------------------------------------------------------------------------------------------------------------------------------------------------------------------------------------------------------------------------------------------------------------------------------------------------------------------------------------------------------------------------------------------------------------------------------------------------------------------------------------------------------------------------------------------------------------------------------------------------------------------------------------------------------------------------------------------------------------------------------------------------------------------------------------------------------------------------------------------------|
| RefSeq: NR_102763.1                                                                                                                                                                                                                                                                                                                                                                                                                                                                                                                                                                                                                                                                                                                                                                                                                                                                                                                                                                                                                                                                                                                                                                                                                                                                                                                                                                                                                                                                                                                                                                                                                                                                                                                                                                                                                                                                                                                                                                                                                                                                                    |                                                                                                                                                                                                                                                                                                                                                                                                                                                                                                                                                                                                                                                                                                                                                                                                                                                                     |
| <p>AACCCCCGCTAGCCCCTTACAGCAAATGCGCTTTTTGC<br/> CCTGAAGTTGTGTGAGACCGACCTTAACTTTCTCCGACC<br/> CTATCTCGGGATGCTACGGCTCAGGTCGTGGTGGTTTTCG<br/> GGAACCTCAAGACAACATCCCCAGCTGACCTTTGGGAA<br/> CTTAACTCGGGTCGTCATGTACGGAAAGGTAGTCTATG<br/> GGGTACGCAGAATGGAAAAGGGCTTCCACATCAGTCGT<br/> GTCCGAGGACGCTCTCCAACTTTTGATGTCCCTGGAGAG<br/> TTTCTGATATTTCCCTGGAGAGTTTCAGAAAAGGATTTCT<br/> CCGACAGACGTGACCCCAAGAGGCTGCCGAGGGGAGACT<br/> TTAGGACAAGAGGCGTTGTTTTGTGAGAATGAATTTTT<br/> ATACTTTACCCCGACCCACCCCTACCCCGCCAGGT<br/> AAATCCAAGTAAATGATTTTCTGAAGGTCGGTCTCCTAG<br/> AAAGCGTTTAGGCTCTGGTTTTTTGTTTTGTTTCTATTTT<br/> GTGTTTTCCAGTTAGGGAAGGAAGAGGAGCCTGTGCA<br/> GAGTTGAACTGGGGTGGAGAGGTGCCTTGAAAGTATG<br/> GTTCCAGAGATGGTGAGACCTCGTAGCTAAGCGTTGTT<br/> TCCTCTGCACGTAAGTGTGAGTTGTGAACTTGTGGCTCCT<br/> GGGGGAGCGGGACAGGGCCTGGCAGTGGGGGGAGG<br/> GGGCAAGGAATTCAGGAAGTTGGCGAGAATTCCTCGTTT<br/> TCATTCTCGTTGTAATTGCTTCTAAACACTTCTGAATT<br/> TTAAATTGCTACCGAGAAGGTCCAGAAAACCGTTCTCATCC<br/> AATTTAGTCACTTTTATTACGTTCCACTTTCCTCCCCAA<br/> TCACTGCGGCGCTCCAGTTTCAGCGTGGCCGCATTTG<br/> GAAAAGGCTGAAGGTAGAAAACCTGGAATGGAGAGGC<br/> TGCGGACTGGAGCAGGATCCAGGGGCTTTAAATTTAAC<br/> CTGAATGCGATCGAATGCGCGACTCCAGAAGAGATAGC<br/> CAGGCGTCCGCCCGCCGCTCAACCCCGCCAGGACTCG<br/> GAATGCCTTGCTTTTGGTTCTTTTCGTGAGTTCCGACCAA<br/> ATGTTAAGTGGACTGGGTTTTGCAGAAGCTCATTTGTA<br/> AGCACTGACGAAATGGGTTGTGGGCATTTGATTTCTT<br/> TGATTCACGTTTTGAAATAATGTTTCTCGGATTTGCTA<br/> TTCGAAGCAATTTTCTAAAACCTCATATCTTATTTGCTAAA<br/> AATAAACTCTTTGGCTCAGTTTGTGTCCAGGCTGTGTACG<br/> GCCTCAACCCTGAGCCCCGAGGAGATCGAGCCCTGGCG<br/> CGAGCCTGATCTGTCTGTGTGTTTCTTTGATTTGCA<br/> AGTACAAGGATGTCTGCGTGGATATCCCTGGACTCGA<br/> TACCCCGGGGACCTGCTTTTCCCGCAGCTCCGCAGAC<br/> GCGGCGGGAGGGCGCGCTGGCCCGGCGCTGCTGGGA<br/> CAGAGGTGAGCAGCGGGGTGGACATTGACCGATTGAC<br/> AACGTTCCGGGCTCTAAGGGCTCGGGAAGGGACCCGGCA<br/> TTTTACCCTCCAGATCCCAATCTATTTTTAAAAATAATGT<br/> TCAAAACATATGGGAAAAATAAGTGATTGCTCCTTTTCAT<br/> GGTCACAGATTGATTTATTTTTTCAGACTGGTTTTCCAAC<br/> CTAACGAGGGAATGGGTAGTGAATGTTGTTGTTGTTGTT<br/> GTTGTTTATGTTGGTTAATTTCGAAATAAACTGTTTAAC<br/> TCGTACAGTTGATTCAGACAG</p> | <p>GTGAGTTGTGAACTTGTGGCTCCTGGGGGAGCGGGACA<br/> GGGCCTGGCAGTGCAGGGGAGGGGGCAAGGAATTCAG<br/> GAAGTTGGCGAGAATTCTTCGTTTTTTCATTCTTCGTTGTA<br/> AATTGCTTCTAAACACTTCTGAATTTTAAATTGCTACCGA<br/> GAAGGTCCAGAAAACCGTTCTCATCAATTTAGTCACTTTT<br/> ATTACGTTCCACTTTGCCTCCCAATCACTGCGGCGGCT<br/> CCCAGTTTCAGCGTGGCCGCATTTGGAAAAGGCTGAAGG<br/> TAGAAAACCTGGAATGGAGAGGCTGGCGACTGGAGCA<br/> GGATCCAGGGGCTTTAAATTTAACCTGAATGCGATCGA<br/> ATGCGCGACTCCAGAAGAGATAGCCAGGCGTCCGCC<br/> GGCCGCTCAACCCCGCCAGGACTCGGAATGCCTTGCTT<br/> TTGGTTCTTTTCGTGAGTTCCGACCAATGTTAAGTGGA<br/> CTGGGTTTTGCAGAAGCTCATTTGTAAGCACTGACGGAA<br/> ATGGGTTGTGGCATTGATTTCTTTGATTCCAACGTTT<br/> TGAAATAATGTTTCTCGGATTTGCTATTCGAAGCAATTT<br/> CTAAAACCTCATATCTTATTTGCTAAAATAAACTCTTTG<br/> GCTCAGTTTGTGTCCAGGCTGTGTACGGCCTCAACCCCTG<br/> AGCCCGAGGAGATCGAGCCCTGGCGCGAGCCTGATCT<br/> CTGTCTGTGTGTTTCTTTGTATTTGCAAG</p> |
